# Supplementary material for: Biobank-wide association scan identifies risk factors for late-onset Alzheimer’s disease and endophenotypes
Source: eLife. 2024 May 24;12:RP91360. doi: 10.7554/eLife.91360 (PMC11126309; doi:10.7554/eLife.91360)
Supplement: Supplementary file 1. [file elife-91360-supp1.docx]

**Supplementary Tables**

**Type-I error rates in simulation settings 1 and 2.** Type-I error rates were calculated as the fraction of traits with p-values below the alpha value.

| **Alpha** | **Setting 1** | **Setting 2** |
| --- | --- | --- |
| 0.1 | 0.124 | 0.117 |
| 0.05 | 0.064 | 0.064 |
| 0.01 | 0.009 | 0.013 |
| 0.005 | 0.003 | 0.006 |
| 0.001 | 0.002 | 0.000 |

**Comparison with Regression.** The list of simulation scenarios where BADGERS and regression analysis made different statistical decisions (i.e. only one method claimed statistical significance at p<0.05) in simulation setting 3.

| **Pvalue**  **cutoff** | **Trait_ID** | **reg-effect** | **reg-se** | **reg-z** | **reg-p** | **badgers-effect** | **badgers-se** | **badgers-z** | **badgers-p** |
| --- | --- | --- | --- | --- | --- | --- | --- | --- | --- |
| 0.015 | C67 | 0.614 | 0.315 | 1.947 | 0.052 | 1.535 | 1.460E-04 | 2.091 | 0.037 |
| 0.015 | 22620_1 | 0.045 | 0.024 | 1.903 | 0.057 | 0.054 | 0.029 | 2.098 | 0.036 |
| 0.015 | 20003_1140879778 | 0.393 | 0.204 | 1.929 | 0.054 | 0.398 | 4.121E-04 | 1.973 | 0.049 |
| 0.015 | 20541 | 0.060 | 0.030 | 1.985 | 0.047 | 0.057 | 0.018 | 1.942 | 0.052 |
| 0.010 | 1150_3 | 0.138 | 0.078 | 1.776 | 0.076 | 0.163 | 0.003 | 1.984 | 0.047 |
| 0.008 | 41248_1001 | 0.215 | 0.113 | 1.906 | 0.057 | 0.242 | 0.001 | 2.021 | 0.043 |
| 0.008 | 20126_3 | 0.080 | 0.043 | 1.867 | 0.062 | 0.107 | 0.008 | 2.158 | 0.031 |
| 0.008 | 3799 | 0.034 | 0.019 | 1.842 | 0.066 | 0.044 | 0.043 | 2.093 | 0.036 |
| 0.008 | 20426 | 0.029 | 0.014 | 2.098 | 0.036 | 0.023 | 0.089 | 1.784 | 0.074 |
| 0.005 | 5133_raw | 0.009 | 0.005 | 1.901 | 0.057 | 0.010 | 0.690 | 2.067 | 0.039 |
| 0.005 | 22617_2132 | 0.122 | 0.058 | 2.109 | 0.035 | 0.005 | 0.051 | 0.106 | 0.051 |
| 0.005 | 20003_1140911698 | 2.934 | 1.415 | 2.073 | 0.038 | 2.569 | 8.596E-06 | 1.921 | 0.055 |

**Marginal and conditional associations of 15 representative traits with AD.**

|  | **Marginal Analysis** | | | **Conditional Analysis** | | |
| --- | --- | --- | --- | --- | --- | --- |
| **Trait** | **Effect** | **SE** | **P** | **Effect** | **SE** | **P** |
| Illnesses of mother: Alzheimer's disease/dementia | 1.885 | 0.101 | 3.7e-77 | 1.808 | 0.102 | 8.1e-71 |
| Illnesses of father: Alzheimer's disease/dementia | 1.495 | 0.136 | 5.2e-28 | 1.394 | 0.138 | 3.8e-24 |
| Non-cancer illness code, self-reported: high cholesterol | 0.536 | 0.068 | 2.5e-15 | 0.535 | 0.069 | 5.3e-15 |
| Qualifications: College or University degree | -0.154 | 0.022 | 4.4e-12 | -0.137 | 0.024 | 9.9e-09 |
| 3mm strong meridian angle (left) | -0.042 | 0.010 | 2.8e-05 | -0.064 | 0.011 | 1.1e-08 |
| Any dementia | 9.084 | 1.399 | 8.5e-11 | 8.073 | 1.423 | 1.4e-08 |
| Final attempt correct: yes | -0.561 | 0.087 | 9.1e-11 | -0.494 | 0.090 | 3.8e-08 |
| Able to pay rent/mortgage as an adult | -0.086 | 0.020 | 2.3e-05 | -0.103 | 0.023 | 5.8e-06 |
| Time to complete round | 0.001 | 0.0002 | 2.8e-09 | 0.001 | 0.0002 | 7.5e-06 |
| Fluid intelligence score | -0.073 | 0.010 | 2.4e-14 | -0.043 | 0.010 | 1.3e-05 |
| Treatment/medication code: garlic product | 1.221 | 0.256 | 1.9e-06 | 1.088 | 0.253 | 1.7e-05 |
| Mother still alive | -0.408 | 0.074 | 4.3e-08 | -0.319 | 0.076 | 2.7e-05 |
| Unable to work because of sickness or disability | 0.701 | 0.124 | 1.7e-08 | 0.455 | 0.125 | 2.6e-04 |
| Duration of moderate activity | 0.146 | 0.025 | 7.4e-09 | 0.092 | 0.026 | 3.6e-04 |
| Non-butter spread type details: Flora Pro-Active or Benecol | 0.310 | 0.065 | 2.0e-06 | 0.179 | 0.073 | 0.014 |

**Results for Mendelian randomization based on the MR-IVW approach.** Among 1,738 heritable UK-biobank traits, 9 traits reached Bonferroni-corrected statistical significance in the meta-analysis.

| **Trait** | **ID** | **Effect** | **SE** | **P** |
| --- | --- | --- | --- | --- |
| Illnesses of mother: Alzheimer's disease/dementia | 20110_10 | 27.974 | 0.857 | 1.09E-233 |
| Illnesses of father: Alzheimer's disease/dementia | 20107_10 | 45.725 | 2.595 | 1.68E-69 |
| Any dementia | KRA_PSY_DEMENTIA | 845.495 | 161.889 | 1.76E-07 |
| Treatment/medication code: insulin product | 20003_1140883066 | -11.032 | 2.213 | 6.16E-07 |
| Non-cancer illness code, self-reported: polymyalgia rheumatica | 20002_1377 | -29.634 | 6.165 | 1.54E-06 |
| Non-cancer illness code, self-reported: high cholesterol | 20002_1473 | 10.220 | 2.220 | 4.14E-06 |
| Medication for cholesterol, blood pressure, diabetes, or take exogenous hormones: Cholesterol lowering medication | 6153_1 | 10.258 | 2.230 | 4.23E-06 |
| Medication for cholesterol, blood pressure or diabetes: Cholesterol lowering medication | 6177_1 | 6.971 | 1.646 | 2.28E-05 |
| Non-butter spread type details: Flora Pro-Active or Benecol | 2654_2 | 16.374 | 3.902 | 2.72E-05 |

**Results for Mendelian randomization.**

| **Trait** | **ID** | **Effect** | **SE** | **P** |
| --- | --- | --- | --- | --- |
| Illnesses of mother: Alzheimer's disease/dementia | 20110_10 | 27.974 | 0.857 | 1.09E-233 |
| Illnesses of father: Alzheimer's disease/dementia | 20107_10 | 45.725 | 2.595 | 1.68E-69 |
| Any dementia | KRA_PSY_DEMENTIA | 336.398 | 68.524 | 9.14E-07 |
| Non-cancer illness code, self-reported: high cholesterol | 20002_1473 | 10.220 | 2.220 | 4.14E-06 |
| Cholesterol lowering medication | 6153_1 | 10.258 | 2.230 | 4.23E-06 |
| Cholesterol lowering medication | 6177_1 | 6.971 | 1.646 | 2.28E-05 |
| Non-butter spread type details: Flora Pro-Active or Benecol | 2654_2 | 16.374 | 3.902 | 2.72E-05 |
| Treatment/medication code: simvastatin | 20003_1140861958 | 14.765 | 3.676 | 5.91E-05 |
| Treatment/medication code: atorvastatin | 20003_1141146234 | 28.482 | 7.293 | 9.41E-05 |
| Qualifications: A levels/AS levels or equivalent | 6138_2 | -1.473 | 0.392 | 1.71E-04 |
| Time spent watching television (TV) | 1070 | 0.828 | 0.225 | 2.38E-04 |
| Qualifications: None of the above | 6138_100 | 1.558 | 0.424 | 2.40E-04 |
| Mother still alive | 1835 | -14.999 | 4.395 | 6.44E-04 |
| Job involves mainly walking or standing | 806 | 0.609 | 0.186 | 1.07E-03 |
| Duration screen displayed | 4290_irnt | 0.438 | 0.144 | 2.35E-03 |
| FI3 : word interpolation | 4957 | -1.143 | 0.389 | 3.29E-03 |
| Qualifications: College or University degree | 6138_1 | -0.892 | 0.323 | 5.81E-03 |
| Job involves heavy manual or physical work | 816 | 0.458 | 0.178 | 0.010 |
| Forced expiratory volume in 1-second (FEV1), predicted | 20153_raw | -0.577 | 0.228 | 0.011 |
| Age completed full time education | 845 | -0.483 | 0.197 | 0.014 |
| Time spent using computer | 1080 | -0.652 | 0.267 | 0.015 |
| Time to complete round | 400_raw | 0.027 | 0.014 | 0.048 |
| Duration of walks | 874_raw | 0.006 | 0.003 | 0.050 |
| Standing height | 50_raw | -0.017 | 0.009 | 0.052 |
| Comparative height size at age 10 | 1697 | -0.220 | 0.113 | 0.052 |
| Standing height | 50_irnt | -0.148 | 0.077 | 0.055 |
| FI6 : conditional arithmetic | 4990 | -0.565 | 0.300 | 0.060 |
| Fluid intelligence score | 20016_raw | -0.129 | 0.069 | 0.062 |
| Year ended full time education | 22501_raw | -0.074 | 0.043 | 0.082 |
| Fluid intelligence score | 20016_irnt | -0.252 | 0.148 | 0.089 |
| Treatment/medication code: garlic product | 20003_1140911732 | 4.091 | 2.860 | 0.153 |
| Age first had sexual intercourse | 2139_irnt | -0.233 | 0.166 | 0.162 |
| Unable to work because of sickness or disability | 6142_4 | 1.843 | 1.361 | 0.176 |
| Time to complete round | 400_irnt | 1.896 | 1.434 | 0.186 |
| Peak expiratory flow (PEF) | 3064_raw | 0.002 | 0.001 | 0.190 |
| Time spend outdoors in summer | 1050 | 0.304 | 0.251 | 0.225 |
| Year ended full time education | 22501_irnt | -0.398 | 0.334 | 0.233 |
| Qualifications: Other professional qualifications eg: nursing, teaching | 6138_6 | -0.638 | 0.541 | 0.239 |
| Duration screen displayed | 4290_raw | 0.001 | 0.001 | 0.255 |
| Time spent outdoors in winter | 1060 | 0.467 | 0.416 | 0.262 |
| Final attempt correct: no | 4294_0 | 0.856 | 0.804 | 0.287 |
| Able to pay rent/mortgage as an adult | 20525 | -0.197 | 0.186 | 0.290 |
| 3mm strong meridian angle (left) | 5104_irnt | 0.033 | 0.121 | 0.788 |
| Never eat eggs, dairy, wheat, sugar: I eat all of the above | 6144_5 | -0.157 | 0.629 | 0.803 |
| Cheese intake | 1408 | 0.046 | 0.191 | 0.808 |
| Forced expiratory volume in 1-second (FEV1) | 3063_raw | 0.042 | 0.185 | 0.821 |
| Duration of moderate activity | 894 | 0.042 | 0.259 | 0.870 |
| Final attempt correct: yes | 4294_1 | 0.022 | 0.827 | 0.979 |

**GSMR results on the IGAP GWAS dataset.** Among 1,738 heritable UK-biobank traits, 18 traits reached Bonferroni-corrected statistical significance.

| **Trait** | **ID** | **Effect** | **SE** | **P** |
| --- | --- | --- | --- | --- |
| Immature reticulocyte fraction | 30280_irnt | 0.285 | 0.002 | 0 |
| Illnesses of mother: Alzheimer's disease/dementia | 20110_10 | 29.210 | 0.797 | 2.38E-294 |
| Heel quantitative ultrasound index (QUI), direct entry | 3147_irnt | 0.371 | 0.019 | 4.64E-82 |
| Arm fat mass (right) | 23120_raw | 1.291 | 0.103 | 2.68E-36 |
| Arm fat percentage (left) | 23123_irnt | 1.408 | 0.140 | 1.04E-23 |
| Ankle spacing width | 3143_irnt | -0.471 | 0.060 | 4.57E-15 |
| Leg fat mass (left) | 23116_irnt | -0.416 | 0.066 | 2.80E-10 |
| Standing height | 50_irnt | -0.165 | 0.029 | 1.36E-08 |
| Standing height | 50_raw | -0.017 | 0.003 | 5.71E-08 |
| Mean reticulocyte volume | 30260_irnt | -0.166 | 0.032 | 1.66E-07 |
| Leg fat percentage (right) | 23111_raw | -0.056 | 0.011 | 2.12E-07 |
| Lymphocyte percentage | 30180_raw | 0.021 | 0.004 | 1.76E-06 |
| Qualifications: A levels/AS levels or equivalent | 6138_2 | -1.515 | 0.328 | 3.77E-06 |
| Comparative height size at age 10 | 1697 | -0.229 | 0.050 | 3.77E-06 |
| Qualifications: College or University degree | 6138_1 | -0.652 | 0.143 | 4.84E-06 |
| Trunk fat-free mass | 23129_irnt | -0.231 | 0.051 | 6.20E-06 |
| Whole body fat-free mass | 23101_raw | -0.022 | 0.005 | 2.17E-05 |
| Trunk predicted mass | 23130_irnt | -0.214 | 0.051 | 2.23E-05 |

**Mendelian randomization result after removing the *APOE* region**.

| **Trait** | **ID** | **Effect** | **SE** | **P** |
| --- | --- | --- | --- | --- |
| Illnesses of mother: Alzheimer's disease/dementia | 20110_10 | 10.004 | 2.086 | 1.63E-06 |
| Qualifications: A levels/AS levels or equivalent | 6138_2 | -1.473 | 0.392 | 1.71E-04 |
| Time spent watching television (TV) | 1070 | 0.828 | 0.225 | 2.38E-04 |
| Qualifications: None of the above | 6138_100 | 1.558 | 0.424 | 2.40E-04 |
| Job involves mainly walking or standing | 806 | 0.609 | 0.186 | 0.001 |
| Duration screen displayed | 4290_irnt | 0.438 | 0.144 | 0.002 |
| FI3 : word interpolation | 4957 | -1.143 | 0.389 | 0.003 |
| Qualifications: College or University degree | 6138_1 | -0.892 | 0.323 | 0.006 |
| Job involves heavy manual or physical work | 816 | 0.458 | 0.178 | 0.010 |
| Forced expiratory volume in 1-second (FEV1), predicted | 20153_raw | -0.577 | 0.228 | 0.011 |
| Age completed full time education | 845 | -0.483 | 0.197 | 0.014 |
| Time spent using computer | 1080 | -0.652 | 0.267 | 0.015 |
| Duration of walks | 874_raw | 0.006 | 0.003 | 0.050 |
| Time to complete round | 400_raw | 0.004 | 0.002 | 0.051 |
| Standing height | 50_raw | -0.017 | 0.009 | 0.052 |
| Illnesses of father: Alzheimer's disease/dementia | 20107_10 | 5.246 | 2.701 | 0.052 |
| Comparative height size at age 10 | 1697 | -0.220 | 0.113 | 0.052 |
| Standing height | 50_irnt | -0.148 | 0.077 | 0.055 |
| FI6 : conditional arithmetic | 4990 | -0.565 | 0.300 | 0.060 |
| Fluid intelligence score | 20016_raw | -0.129 | 0.069 | 0.062 |
| Year ended full time education | 22501_raw | -0.074 | 0.043 | 0.082 |
| Fluid intelligence score | 20016_irnt | -0.252 | 0.148 | 0.089 |
| Mother still alive | 1835 | 1.223 | 0.850 | 0.150 |
| Qualifications: Other professional qualifications eg: nursing, teaching | 6138_6 | -0.768 | 0.536 | 0.151 |
| Treatment/medication code: garlic product | 20003_1140911732 | 4.091 | 2.860 | 0.153 |
| Age first had sexual intercourse | 2139_irnt | -0.233 | 0.166 | 0.162 |
| Unable to work because of sickness or disability | 6142_4 | 1.843 | 1.361 | 0.176 |
| Peak expiratory flow (PEF) | 3064_raw | 0.002 | 0.001 | 0.190 |
| Any dementia | KRA_PSY_DEMENTIA | 13.507 | 11.109 | 0.224 |
| Time spend outdoors in summer | 1050 | 0.304 | 0.251 | 0.225 |
| Year ended full time education | 22501_irnt | -0.398 | 0.334 | 0.233 |
| Duration screen displayed | 4290_raw | 0.001 | 0.001 | 0.255 |
| Time spent outdoors in winter | 1060 | 0.467 | 0.416 | 0.262 |
| Final attempt correct: no | 4294_0 | 0.856 | 0.804 | 0.287 |
| Able to pay rent/mortgage as an adult | 20525 | -0.197 | 0.186 | 0.290 |
| Cholesterol lowering medication | 6177_1 | 0.188 | 0.259 | 0.469 |
| Non-butter spread type details: Flora Pro-Active or Benecol | 2654_2 | -0.361 | 0.587 | 0.538 |
| Treatment/medication code: simvastatin | 20003_1140861958 | -0.335 | 0.600 | 0.577 |
| Time to complete round | 400_irnt | 0.098 | 0.221 | 0.659 |
| Cholesterol lowering medication | 6153_1 | -0.132 | 0.323 | 0.682 |
| Non-cancer illness code, self-reported: high cholesterol | 20002_1473 | 0.106 | 0.298 | 0.722 |
| 3mm strong meridian angle (left) | 5104_irnt | 0.033 | 0.121 | 0.788 |
| Never eat eggs, dairy, wheat, sugar: I eat all of the above | 6144_5 | -0.157 | 0.629 | 0.803 |
| Cheese intake | 1408 | 0.046 | 0.191 | 0.808 |
| Forced expiratory volume in 1-second (FEV1) | 3063_raw | 0.042 | 0.185 | 0.821 |
| Duration of moderate activity | 894 | 0.042 | 0.259 | 0.870 |
| Final attempt correct: yes | 4294_1 | 0.022 | 0.827 | 0.979 |
| Treatment/medication code: atorvastatin | 20003_1141146234 | -0.022 | 1.023 | 0.983 |

**Details on GWAS datasets for AD endophenotypes.**

| **Category** | **Trait** | **N** | **Ref.** |
| --- | --- | --- | --- |
| AD Subgroup | EPAD_language | 3,768 | [1, 2] |
| EPAD_memory | 4,097 |
| EPAD_visuospatial | 3,738 |
| EPAD_mix | 3,585 |
| EPAD_none | 4,418 |
| CSF Biomarkers | Ab42 | 3,115 | [3, 4] |
| Ab42_male | 1,515 |
| Ab42_female | 1,501 |
| Ptau | 2,833 |
| Ptau_male | 1,452 |
| Ptau_female | 1,381 |
| Tau | 3,108 |
| Tau_male | 1,508 |
| Tau_female | 1,498 |
| Neuropathologic Features | CAA | 2,807 | [5] |
| NFT_Braak_4 | 4,735 |
| NFT_Braak_ordinal | 4,707 |
| LBD_3 | 3,526 |
| LBD_any | 3,526 |
| LBD_ordinal | 3,525 |
| HS | 2,886 |
| NP_any | 4,046 |
| NP_ordinal | 4,232 |
| NP_complete | 3,702 |
| NP_primary | 4,914 |
| VBI_any | 2,764 |
| VBI_ordinal | 2,940 |

**Heritability of 48 identified traits in the marginal association analysis.** All identified traits held heritability over 0.0025

| **Trait** | **ID** | **H2** |
| --- | --- | --- |
| Standing height | 50_raw | 0.427 |
| Standing height | 50_irnt | 0.423 |
| Forced expiratory volume in 1-second (FEV1), predicted | 20153_raw | 0.422 |
| Fluid intelligence score | 20016_raw | 0.228 |
| Comparative height size at age 10 | 1697 | 0.222 |
| Fluid intelligence score | 20016_irnt | 0.221 |
| Forced expiratory volume in 1-second (FEV1) | 3063_raw | 0.178 |
| Qualifications: College or University degree | 6138_1 | 0.162 |
| Age first had sexual intercourse | 2139_irnt | 0.154 |
| Year ended full time education | 22501_raw | 0.148 |
| Year ended full time education | 22501_irnt | 0.136 |
| Duration screen displayed | 4290_irnt | 0.113 |
| Age completed full time education | 845 | 0.104 |
| Time spent watching television (TV) | 1070 | 0.104 |
| Peak expiratory flow (PEF) | 3064_raw | 0.103 |
| Qualifications: None of the above | 6138_100 | 0.103 |
| Time spent using computer | 1080 | 0.096 |
| Qualifications: A levels/AS levels or equivalent | 6138_2 | 0.091 |
| FI6: conditional arithmetic | 4990 | 0.091 |
| Time to complete round | 400_irnt | 0.087 |
| FI3: word interpolation | 4957 | 0.084 |
| Job involves heavy manual or physical work | 816 | 0.081 |
| Medication for cholesterol, blood pressure or diabetes: Cholesterol lowering medication | 6177_1 | 0.080 |
| 3mm strong meridian angle (left) | 5104_irnt | 0.077 |
| Job involves mainly walking or standing | 806 | 0.076 |
| Time spend outdoors in summer | 1050 | 0.072 |
| Cheese intake | 1408 | 0.068 |
| Time to complete round | 400_raw | 0.062 |
| Duration screen displayed | 4290_raw | 0.060 |
| Medication for cholesterol, blood pressure, diabetes, or take exogenous hormones: Cholesterol lowering medication | 6153_1 | 0.057 |
| Non-cancer illness code, self-reported: high cholesterol | 20002_1473 | 0.047 |
| Never eat eggs, dairy, wheat, sugar: I eat all of the above | 6144_5 | 0.047 |
| Time spent outdoors in winter | 1060 | 0.044 |
| Qualifications: Other professional qualifications eg: nursing, teaching | 6138_6 | 0.044 |
| Duration of walks | 874_raw | 0.040 |
| Duration of moderate activity | 894 | 0.032 |
| Treatment/medication code: simvastatin | 20003_1140861958 | 0.031 |
| Current employment status: Unable to work because of sickness or disability | 6142_4 | 0.024 |
| Able to pay rent/mortgage as an adult | 20525 | 0.023 |
| Final attempt correct: yes | 4294_1 | 0.021 |
| Final attempt correct: no | 4294_0 | 0.021 |
| Illnesses of mother: Alzheimer's disease/dementia | 20110_10 | 0.018 |
| Treatment/medication code: atorvastatin | 20003_1141146234 | 0.014 |
| Illnesses of father: Alzheimer's disease/dementia | 20107_10 | 0.014 |
| Non-butter spread type details: Flora Pro-Active or Benecol | 2654_2 | 0.014 |
| Mother still alive | 1835 | 0.005 |
| Any dementia | KRA_PSY_DEMENTIA | 0.003 |
| Treatment/medication code: garlic product | 20003_1140911732 | 0.003 |

**Acknowledgements to ADGC**

The National Institutes of Health, National Institute on Aging (NIH-NIA) supported this work through the following grants: ADGC, U01 AG032984, RC2 AG036528; Samples from the National Cell Repository for Alzheimer’s Disease (NCRAD), which receives government support under a cooperative agreement grant (U24 AG21886) awarded by the National Institute on Aging (NIA), were used in this study. We thank contributors who collected samples used in this study, as well as patients and their families, whose help and participation made this work possible; Data for this study were prepared, archived, and distributed by the National Institute on Aging Alzheimer’s Disease Data Storage Site (NIAGADS) at the University of Pennsylvania (U24-AG041689-01); NACC, U01 AG016976; NIA LOAD (Columbia University), U24 AG026395, U24 AG026390, R01AG041797; Banner Sun Health Research Institute P30 AG019610; Boston University, P30 AG013846, U01 AG10483, R01 CA129769, R01 MH080295, R01 AG017173, R01 AG025259, R01 AG048927, R01AG33193, R01 AG009029; Columbia University, P50 AG008702, R37 AG015473, R01 AG037212, R01 AG028786; Duke University, P30 AG028377, AG05128; Emory University, AG025688; Group Health Research Institute, UO1 AG006781, UO1 HG004610, UO1 HG006375, U01 HG008657; Indiana University, P30 AG10133, R01 AG009956, RC2 AG036650; Johns Hopkins University, P50 AG005146, R01 AG020688; Massachusetts General Hospital, P50 AG005134; Mayo Clinic, P50 AG016574, R01 AG032990, KL2 RR024151; Mount Sinai School of Medicine, P50 AG005138, P01 AG002219; New York University, P30 AG08051, UL1 RR029893, 5R01AG012101, 5R01AG022374, 5R01AG013616, 1RC2AG036502, 1R01AG035137; North Carolina A&T University, P20 MD000546, R01 AG28786-01A1; Northwestern University, P30 AG013854; Oregon Health & Science University, P30 AG008017, R01 AG026916; Rush University, P30 AG010161, R01 AG019085, R01 AG15819, R01 AG17917, R01 AG030146, R01 AG01101, RC2 AG036650, R01 AG22018; TGen, R01 NS059873; University of Alabama at Birmingham, P50 AG016582; University of Arizona, R01 AG031581; University of California, Davis, P30 AG010129; University of California, Irvine, P50 AG016573; University of California, Los Angeles, P50 AG016570; University of California, San Diego, P50 AG005131; University of California, San Francisco, P50 AG023501, P01 AG019724; University of Kentucky, P30 AG028383, AG05144; University of Michigan, P50 AG008671; University of Pennsylvania, P30 AG010124; University of Pittsburgh, P50 AG005133, AG030653, AG041718, AG07562, AG02365; University of Southern California, P50 AG005142; University of Texas Southwestern, P30 AG012300; University of Miami, R01 AG027944, AG010491, AG027944, AG021547, AG019757; University of Washington, P50 AG005136, R01 AG042437; University of Wisconsin, P50 AG033514; Vanderbilt University, R01 AG019085; and Washington University, P50 AG005681, P01 AG03991, P01 AG026276. The Kathleen Price Bryan Brain Bank at Duke University Medical Center is funded by NINDS grant # NS39764, NIMH MH60451 and by Glaxo Smith Kline. Support was also from the Alzheimer’s Association (LAF, IIRG-08-89720; MP-V, IIRG-05-14147), the US Department of Veterans Affairs Administration, Office of Research and Development, Biomedical Laboratory Research Program, and BrightFocus Foundation (MP-V, A2111048). P.S.G.-H. is supported by Wellcome Trust, Howard Hughes Medical Institute, and the Canadian Institute of Health Research. Genotyping of the TGEN2 cohort was supported by Kronos Science. The TGen series was also funded by NIA grant AG041232 to AJM and MJH, The Banner Alzheimer’s Foundation, The Johnnie B. Byrd Sr. Alzheimer’s Institute, the Medical Research Council, and the state of Arizona and also includes samples from the following sites: Newcastle Brain Tissue Resource (funding via the Medical Research Council, local NHS trusts and Newcastle University), MRC London Brain Bank for Neurodegenerative Diseases (funding via the Medical Research Council),South West Dementia Brain Bank (funding via numerous sources including the Higher Education Funding Council for England (HEFCE), Alzheimer’s Research Trust (ART), BRACE as well as North Bristol NHS Trust Research and Innovation Department and DeNDRoN), The Netherlands Brain Bank (funding via numerous sources including Stichting MS Research, Brain Net Europe, Hersenstichting Nederland Breinbrekend Werk, International Parkinson Fonds, Internationale Stiching Alzheimer Onderzoek), Institut de Neuropatologia, Servei Anatomia Patologica, Universitat de Barcelona. ADNI data collection and sharing was funded by the National Institutes of Health Grant U01 AG024904 and Department of Defense award number W81XWH-12-2-0012. ADNI is funded by the National Institute on Aging, the National Institute of Biomedical Imaging and Bioengineering, and through generous contributions from the following: AbbVie, Alzheimer’s Association; Alzheimer’s Drug Discovery Foundation; Araclon Biotech; BioClinica, Inc.; Biogen; Bristol-Myers Squibb Company; CereSpir, Inc.; Eisai Inc.; Elan Pharmaceuticals, Inc.; Eli Lilly and Company; EuroImmun; F. Hoffmann-La Roche Ltd and its affiliated company Genentech, Inc.; Fujirebio; GE Healthcare; IXICO Ltd.; Janssen Alzheimer Immunotherapy Research & Development, LLC.; Johnson & Johnson Pharmaceutical Research & Development LLC.; Lumosity; Lundbeck; Merck & Co., Inc.; Meso Scale Diagnostics, LLC.; NeuroRx Research; Neurotrack Technologies; Novartis Pharmaceuticals Corporation; Pfizer Inc.; Piramal Imaging; Servier; Takeda Pharmaceutical Company; and Transition Therapeutics. The Canadian Institutes of Health Research is providing funds to support ADNI clinical sites in Canada. Private sector contributions are facilitated by the Foundation for the National Institutes of Health (www.fnih.org). The grantee organization is the Northern California Institute for Research and Education, and the study is coordinated by the Alzheimer's Disease Cooperative Study at the University of California, San Diego. ADNI data are disseminated by the Laboratory for Neuro Imaging at the University of Southern California. We thank Drs. D. Stephen Snyder and Marilyn Miller from NIA who are *ex-officio* ADGC members.

We would also like to thank all the members of ADGC: Erin Abner 1, Perrie M. Adams 2, Marilyn S. Albert 3, Roger L. Albin 4-,6, Liana G. Apostolova 7-10, Steven E. Arnold 11, Sanjay Asthana 12-14, Craig S. Atwood 12-14, Clinton T. Baldwin 15, Robert C. Barber 16, Lisa L. Barnes 17-19, Sandra Barral 20-22, Thomas G. Beach 23, James T. Becker 24, Gary W. Beecham 25,26, Duane Beekly 27, David A. Bennett 17,19, Eileen H. Bigio 28,29, Thomas D. Bird 30,31, Deborah Blacker 32,33, Bradley F. Boeve 34, James D. Bowen 35, Adam Boxer 36, James R. Burke 37, Jeffrey M. Burns 38, Joseph D. Buxbaum 39-41, Nigel J. Cairns 42, Laura B. Cantwell 43, Chuanhai Cao 44, Chris S. Carlson 45, Cynthia M. Carlsson 12-14, Regina M. Carney 46, Minerva M. Carrasquillo 47, Helena C. Chui 48, Paul K. Crane 49, David H. Cribbs 50, Elizabeth A. Crocco 46, Carlos Cruchaga 51, Philip L. De Jager 52,53, Charles DeCarli 54, Malcolm Dick 55, Dennis W. Dickson 47, Rachelle S. Doody 56, Ranjan Duara 57, Nilufer Ertekin-Taner 47,58, Denis A. Evans 59, Kelley M. Faber 8, Thomas J. Fairchild 60, Kenneth B. Fallon 61, David W. Fardo 62, Martin R. Farlow 63, Lindsay A. Farrer 64-68, Steven Ferris 69, Tatiana M. Foroud 8, Matthew P. Frosch 70, Douglas R. Galasko 71, Marla Gearing 72,73, Daniel H. Geschwind 74, Bernardino Ghetti 75, John R. Gilbert 25,26, Alison M. Goate 39, Neill R. Graff-Radford 47,58, Robert C. Green 76, John H. Growdon 77, Jonathan L. Haines 78, Hakon Hakonarson 79, Ronald L. Hamilton 80, Kara L. Hamilton-Nelson 25, John Hardy 81, Lindy E. Harrell 82, Lawrence S. Honig 20, Ryan M. Huebinger 83, Matthew J. Huentelman 84, Christine M. Hulette 85, Bradley T. Hyman 77, Gail P. Jarvik 86,87, Lee-Way Jin 88, Gyungah Jun 15,64,68, M. Ilyas Kamboh 89,90, Anna Karydas 36, Mindy J. Katz 91, John S.K. Kauwe 92, Jeffrey A. Kaye 93,94, C. Dirk Keene 95, Ronald Kim 96, Neil W. Kowall67,97, Joel H. Kramer 98, Walter A. Kukull 99, Brian W. Kunkle 25, Amanda P. Kuzma 43, Frank M. LaFerla 100, James J. Lah 101, Eric B. Larson 49,102, James B. Leverenz 103, Allan I. Levey 101, Ge Li 31,104, Andrew P. Lieberman 105, Richard B. Lipton 91, Oscar L. Lopez 90, Kathryn L. Lunetta 64, Constantine G. Lyketsos 106, John Malamon 43, Daniel C. Marson 82, Eden R. Martin 25,26, Frank Martiniuk 107, Deborah C. Mash 108, Eliezer Masliah 71,109, Richard Mayeux 20,21, Wayne C. McCormick 49, Susan M. McCurry 110, Andrew N. McDavid 45, Stefan McDonough 111, Ann C. McKee 67,97, Marsel Mesulam 29,112, Bruce L. Miller36, Carol A. Miller 113, Joshua W. Miller 88, Thomas J. Montine 95, John C. Morris 42,114, Shubhabrata Mukherjee 49, Amanda J. Myers 46, Adam C. Naj 43, Sid O’Bryant 115, John M. Olichney 54, Joseph E. Parisi116, Henry L. Paulson 117, Margaret A. Pericak-Vance 25,26, Elaine Peskind 104, Ronald C. Petersen 34, Aimee Pierce 50, Wayne W. Poon 55, Huntington Potter 118, Liming Qu 43, Joseph F. Quinn 93,94, Ashok Raj44, Murray Raskind 104, Eric M. Reiman 84,119-121, Barry Reisberg 69,122, Joan S. Reisch 123, Christiane Reitz20-22,124, John M. Ringman 48, Erik D. Roberson 82, Ekaterina Rogaeva 125, Howard J. Rosen 36, Roger N. Rosenberg 127, Donald R. Royall 128, Mark A. Sager 13, Mary Sano 40, Andrew J. Saykin 7,8, Gerard D. Schellenberg 43, Julie A. Schneider 17,19,129, Lon S. Schneider 48,130, William W. Seeley 36, Amanda G. Smith44, Joshua A. Sonnen 95, Salvatore Spina 75, Peter St George-Hyslop 131,132, Robert A. Stern 67, Russell H. Swerdlow 38, Rudolph E. Tanzi 77, John Q. Trojanowski 133, Juan C. Troncoso 134, Debby W. Tsuang 31,104, Otto Valladares 43, Vivianna M. Van Deerlin 133, Linda J. Van Eldik 135, Badri N. Vardarajan 20-22, Harry V. Vinters 136,137, Jean Paul Vonsattel 138, Li-San Wang 43, Sandra Weintraub 28,29, Kathleen A. Welsh-Bohmer37,139, Kirk C. Wilhelmsen 140, Jennifer Williamson 20, Thomas S. Wingo 101, Randall L. Woltjer 141, Clinton B. Wright 142, Chuang-Kuo Wu 143, Steven G. Younkin 47, Chang-En Yu 49, Lei Yu 17,19, Yi Zhao 43

1Sanders-Brown Center on Aging, College of Public Health, Department of Epidemiology, University of Kentucky, Lexington, Kentucky, 2Department of Psychiatry, University of Texas Southwestern Medical Center, Dallas, Texas, 3Department of Neurology, Johns Hopkins University, Baltimore, Maryland, 4Department of Neurology, University of Michigan, Ann Arbor, Michigan, 5Geriatric Research, Education and Clinical Center (GRECC), VA Ann Arbor Healthcare System (VAAAHS), Ann Arbor, Michigan, 6Michigan Alzheimer Disease Center, Ann Arbor, Michigan, 7Department of Radiology, Indiana University, Indianapolis, Indiana, 8Department of Medical and Molecular Genetics, Indiana University, Indianapolis, Indiana, 9Indian Alzheimer's Disease Center, Indiana University, Indianapolis, Indiana, 10Department of Neurology, Indiana University, Indianapolis, Indiana, 11Department of Psychiatry, University of Pennsylvania Perelman School of Medicine, Philadelphia, Pennsylvania, 12Geriatric Research, Education and Clinical Center (GRECC), University of Wisconsin, Madison, Wisconsin, 13Department of Medicine, University of Wisconsin, Madison, Wisconsin, 14Wisconsin Alzheimer's Disease Research Center, Madison, Wisconsin, 1 Department of Medicine (Genetics Program), Boston University, Boston, Massachusetts, 16Department of Pharmacology and Neuroscience, University of North Texas Health Science Center, Fort Worth, Texas, 17Department of Neurological Sciences, Rush University Medical Center, Chicago, Illinois, 18Department of Behavioral Sciences, Rush University Medical Center, Chicago, Illinois, 19Rush Alzheimer's Disease Center, Rush University Medical Center, Chicago, Illinois, 20Taub Institute on Alzheimer's Disease and the Aging Brain, Department of Neurology, Columbia University, New York, New York, 21Gertrude H. Sergievsky Center, Columbia University, New York, New York, 22Department of Neurology, Columbia University, New York, New York, 23Civin Laboratory for Neuropathology, Banner Sun Health Research Institute, Phoenix, Arizona, 24Departments of Psychiatry, Neurology, and Psychology, University of Pittsburgh School of Medicine, Pittsburgh, Pennsylvania, 25The John P. Hussman Institute for Human Genomics, University of Miami, Miami, Florida, 26Dr. John T. Macdonald Foundation Department of Human Genetics, University of Miami, Miami, Florida, 27National Alzheimer's Coordinating Center, University of Washington, Seattle, Washington, 28Department of Pathology, Northwestern University Feinberg School of Medicine, Chicago, Illinois, 29Cognitive Neurology and Alzheimer's Disease Center, Northwestern University Feinberg School of Medicine, Chicago, Illinois, 30Department of Neurology, University of Washington, Seattle, Washington, 31VA Puget Sound Health Care System/GRECC, Seattle, Washington, 32Department of Epidemiology, Harvard School of Public Health, Boston, Massachusetts, 33Department of Psychiatry, Massachusetts General Hospital/Harvard Medical School, Boston, Massachusetts, 34Department of Neurology, Mayo Clinic, Rochester, Minnesota, 35Swedish Medical Center, Seattle, Washington, 36Department of Neurology, University of California San Francisco, San Francisco, California, 37Department of Medicine, Duke University, Durham, North Carolina, 38University of Kansas Alzheimer’s Disease Center, University of Kansas Medical Center, Kansas City, Kansas, 39Department of Neuroscience, Mount Sinai School of Medicine, New York, New York, 40Department of Psychiatry, Mount Sinai School of Medicine, New York, New York, 41Departments of Genetics and Genomic Sciences, Mount Sinai School of Medicine, New York, New York, 42Department of Pathology and Immunology, Washington University, St. Louis, Missouri, 43Penn Neurodegeneration Genomics Center, Department of Pathology and Laboratory Medicine, University of Pennsylvania Perelman School of Medicine, Philadelphia, Pennsylvania, 44USF Health Byrd Alzheimer's Institute, University of South Florida, Tampa, Florida, 45Fred Hutchinson Cancer Research Center, Seattle, Washington, 46Department of Psychiatry and Behavioral Sciences, Miller School of Medicine, University of Miami, Miami, Florida, 47Department of Neuroscience, Mayo Clinic, Jacksonville, Florida, 48Department of Neurology, University of Southern California, Los Angeles, California, 49Department of Medicine, University of Washington, Seattle, Washington, 50Department of Neurology, University of California Irvine, Irvine, California, 51Department of Psychiatry and Hope Center Program on Protein Aggregation and Neurodegeneration, Washington University School of Medicine, St. Louis, Missouri, 52Program in Translational NeuroPsychiatric Genomics, Institute for the Neurosciences, Department of Neurology & Psychiatry, Brigham and Women's Hospital and Harvard Medical School, Boston, Massachusetts, 53Program in Medical and Population Genetics, Broad Institute, Cambridge, Massachusetts, 54Department of Neurology, University of California Davis, Sacramento, California, 55Institute for Memory Impairments and Neurological Disorders, University of California Irvine, Irvine, California, 56Alzheimer's Disease and Memory Disorders Center, Baylor College of Medicine, Houston, Texas, 57Wien Center for Alzheimer's Disease and Memory Disorders, Mount Sinai Medical Center, Miami Beach, Florida, 58Department of Neurology, Mayo Clinic, Jacksonville, Florida, 59Rush Institute for Healthy Aging, Department of Internal Medicine, Rush University Medical Center, Chicago, Illinois, 60Office of Strategy and Measurement, University of North Texas Health Science Center, Fort Worth, Texas, 61Department of Pathology, University of Alabama at Birmingham, Birmingham, Alabama, 62Sanders-Brown Center on Aging, Department of Biostatistics, University of Kentucky, Lexington, Kentucky, 63Department of Neurology, Indiana University, Indianapolis, Indiana, 64Department of Biostatistics, Boston University, Boston, Massachusetts, 65Department of Epidemiology, Boston University, Boston, Massachusetts, 66Department of Medicine (Biomedical Genetics), Boston University, Boston, Massachusetts, 67Department of Neurology, Boston University, Boston, Massachusetts, 68Department of Ophthalmology, Boston University, Boston, Massachusetts, 69Department of Psychiatry, New York University, New York, New York, 70C.S. Kubik Laboratory for Neuropathology, Massachusetts General Hospital, Charlestown, Massachusetts, 71Department of Neurosciences, University of California San Diego, La Jolla, California, 72Department of Pathology and Laboratory Medicine, Emory University, Atlanta, Georgia, 73Emory Alzheimer's Disease Center, Emory University, Atlanta, Georgia, 74Neurogenetics Program, University of California Los Angeles, Los Angeles, California, 75Department of Pathology and Laboratory Medicine, Indiana University, Indianapolis, Indiana, 76Division of Genetics, Department of Medicine and Partners Center for Personalized Genetic Medicine, Brigham and Women's Hospital and Harvard Medical School, Boston, Massachusetts, 77Department of Neurology, Massachusetts General Hospital/Harvard Medical School, Boston, Massachusetts, 78Department of Epidemiology and Biostatistics, Case Western Reserve University, Cleveland, Ohio, 79Center for Applied Genomics, Children's Hospital of Philadelphia, Philadelphia, Pennsylvania, 80Department of Pathology (Neuropathology), University of Pittsburgh, Pittsburgh, Pennsylvania, 81Institute of Neurology, University College London, Queen Square, London, United Kingdom, 82Department of Neurology, University of Alabama at Birmingham, Birmingham, Alabama, 83Department of Surgery, University of Texas Southwestern Medical Center, Dallas, Texas, 84Neurogenomics Division, Translational Genomics Research Institute, Phoenix, Arizona, 85Department of Pathology, Duke University, Durham, North Carolina, 86Department of Genome Sciences, University of Washington, Seattle, Washington, 87Department of Medicine (Medical Genetics), University of Washington, Seattle, Washington, 88Department of Pathology and Laboratory Medicine, University of California Davis, Sacramento, California, 89Department of Human Genetics, University of Pittsburgh, Pittsburgh, Pennsylvania, 90University of Pittsburgh Alzheimer's Disease Research Center, Pittsburgh, Pennsylvania, 91Department of Neurology, Albert Einstein College of Medicine, New York, New York, 92Department of Biology, Brigham Young University, Provo, Utah, 93Department of Neurology, Oregon Health & Science University, Portland, Oregon, 94Department of Neurology, Portland Veterans Affairs Medical Center, Portland, Oregon, 95Department of Pathology, University of Washington, Seattle, Washington, 96Department of Pathology and Laboratory Medicine, University of California Irvine, Irvine, California, 97Department of Pathology, Boston University, Boston, Massachusetts, 98Department of Neuropsychology, University of California San Francisco, San Francisco, California, 99Department of Epidemiology, University of Washington, Seattle, Washington, 100Department of Neurobiology and Behavior, University of California Irvine, Irvine, California, 101Department of Neurology, Emory University, Atlanta, Georgia, 102Group Health Research Institute, Group Health, Seattle, Washington, 103Cleveland Clinic Lou Ruvo Center for Brain Health, Cleveland Clinic, Cleveland, Ohio, 104Department of Psychiatry and Behavioral Sciences, University of Washington School of Medicine, Seattle, Washington, 105Department of Pathology, University of Michigan, Ann Arbor, Michigan, 106Department of Psychiatry, Johns Hopkins University, Baltimore, Maryland, 107Department of Medicine - Pulmonary, New York University, New York, New York, 108Department of Neurology, University of Miami, Miami, Florida, 109Department of Pathology, University of California San Diego, La Jolla, California, 110School of Nursing Northwest Research Group on Aging, University of Washington, Seattle, Washington, 111PharmaTherapeutics Clinical Research, Pfizer Worldwide Research and Development, Cambridge, Massachusetts, 112Department of Neurology, Northwestern University Feinberg School of Medicine, Chicago, Illinois, 113Department of Pathology, University of Southern California, Los Angeles, California, 114Department of Neurology, Washington University, St. Louis, Missouri, 115Internal Medicine, Division of Geriatrics, University of North Texas Health Science Center, Fort Worth, Texas, 116Department of Laboratory Medicine and Pathology, Mayo Clinic, Rochester, Minnesota, 117Michigan Alzheimer's Disease Center, Department of Neurology, University of Michigan, Ann Arbor, Michigan, 118Department of Neurology, University of Colorado School of Medicine, Aurora, Colorado, 119Arizona Alzheimer’s Consortium, Phoenix, Arizona, 120Banner Alzheimer's Institute, Phoenix, Arizona, 121Department of Psychiatry, University of Arizona, Phoenix, Arizona, 122Alzheimer's Disease Center, New York University, New York, New York, 123Department of Clinical Sciences, University of Texas Southwestern Medical Center, Dallas, Texas, 124Department of Epidemiology, Columbia University, New York, New York, 125 Tanz Centre for Research in Neurodegenerative Disease, University of Toronto, Toronto, Ontario, 127Department of Neurology, University of Texas Southwestern, Dallas, Texas, 128Departments of Psychiatry, Medicine, Family & Community Medicine, South Texas Veterans Health Administration Geriatric Research Education & Clinical Center (GRECC), UT Health Science Center at San Antonio, San Antonio, Texas, 129Department of Pathology (Neuropathology), Rush University Medical Center, Chicago, Illinois, 130Department of Psychiatry, University of Southern California, Los Angeles, California, 131Tanz Centre for Research in Neurodegenerative Disease, University of Toronto, Toronto, Ontario, 132Cambridge Institute for Medical Research and Department of Clinical Neurosciences, University of Cambridge, Cambridge, United Kingdom, 133Department of Pathology and Laboratory Medicine, University of Pennsylvania Perelman School of Medicine, Philadelphia, Pennsylvania, 134Department of Pathology, Johns Hopkins University, Baltimore, Maryland, 135Sanders-Brown Center on Aging, Department of Anatomy and Neurobiology, University of Kentucky, Lexington, Kentucky, 136Department of Neurology, University of California Los Angeles, Los Angeles, California, 137Department of Pathology & Laboratory Medicine, University of California Los Angeles, Los Angeles, California, 138Taub Institute on Alzheimer's Disease and the Aging Brain, Department of Pathology, Columbia University, New York, New York, 139Department of Psychiatry & Behavioral Sciences, Duke University, Durham, North Carolina, 140Department of Genetics, University of North Carolina Chapel Hill, Chapel Hill, North Carolina, 141Department of Pathology, Oregon Health & Science University, Portland, Oregon, 142Evelyn F. McKnight Brain Institute, Department of Neurology, Miller School of Medicine, University of Miami, Miami, Florida, 143Departments of Neurology, Pharmacology & Neuroscience, Texas Tech University Health Science Center, Lubbock, Texas.

**References**

1. Mukherjee, S., et al., *Genetic data and cognitively-defined late-onset Alzheimer's disease subgroups.* bioRxiv, 2018: p. 367615.

2. Crane, P.K., et al., *Incidence of cognitively defined late-onset Alzheimer's dementia subgroups from a prospective cohort study.* Alzheimer's & Dementia, 2017. **13**(12): p. 1307-1316.

3. Deming, Y., et al., *Genome-wide association study identifies four novel loci associated with Alzheimer’s endophenotypes and disease modifiers.* Acta neuropathologica, 2017. **133**(5): p. 839-856.

4. Deming, Y., et al., *Sex-specific genetic predictors of Alzheimer’s disease biomarkers.* Acta neuropathologica, 2018: p. 1-16.

5. Beecham, G.W., et al., *Genome-wide association meta-analysis of neuropathologic features of Alzheimer's disease and related dementias.* PLoS genetics, 2014. **10**(9): p. e1004606.
